# Supplementary material for: Structure and tautomerism of azo coupling products from N-alkylenaminones derived from acetylacetone and benzoylacetone in solid phase and in solution
Source: Royal Society of Chemistry journal article supplement (doi:10.1039/b613346k), 2007-01-01
Supplement: b613346k.pdf [file b613346k.pdf]

## Electronic Supporting Information

### Structure and Tautomerism of Azo Coupling Products from *N*-Alkylenaminones Derived from Acetylacetone and Benzoylacetone in Solid Phase and in Solution

Petr Šimůnek,<sup>\*a</sup> Markéta Svobodová,<sup>a</sup> Valerio Bertolasi,<sup>b</sup> Loretta Pretto,<sup>b</sup> Antonín Lyčka<sup>c</sup> and Vladimír Macháček<sup>a</sup>

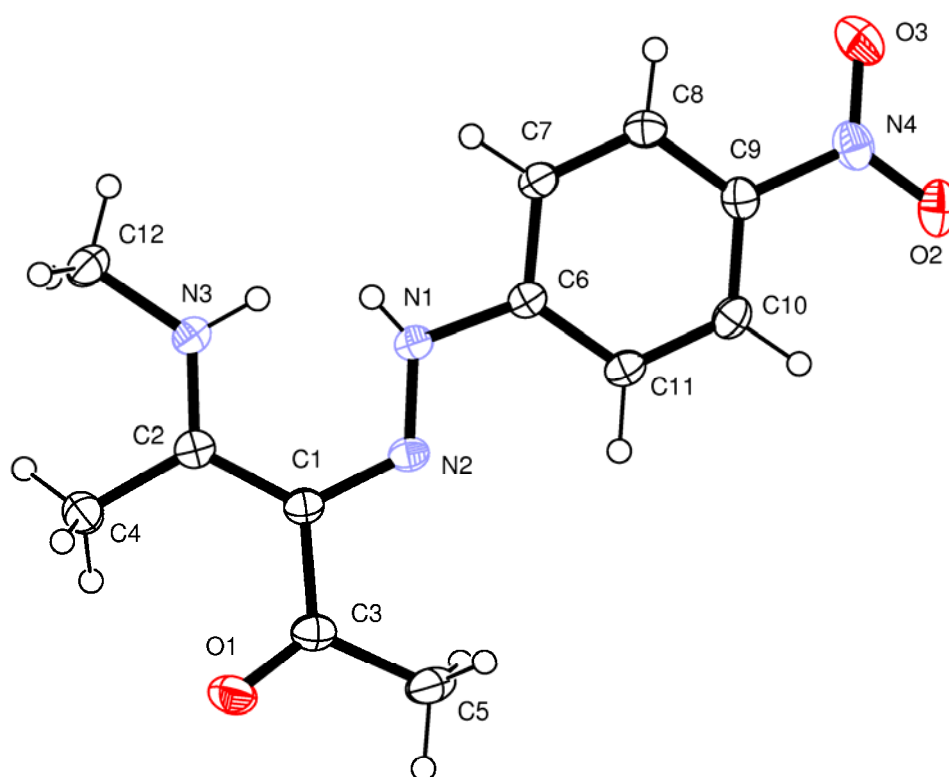

ORTEP view of compound **3b**. Thermal ellipsoids are drawn at 40% probability level. Both tautomeric hydrogens linked to N1 and N3 atoms, are displayed.

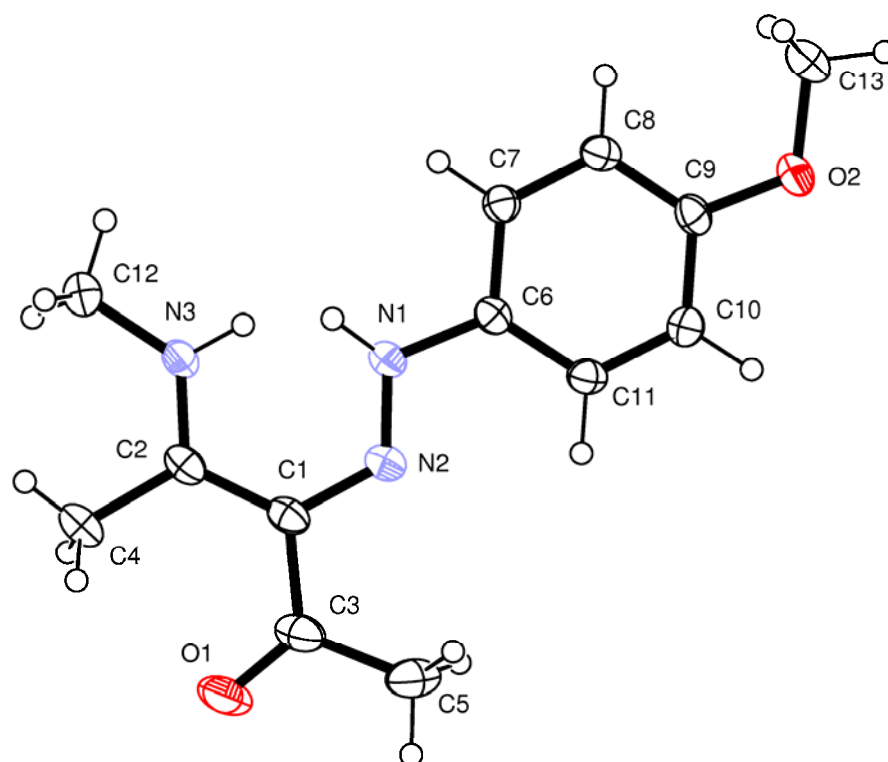

ORTEP view of compound **3c**. Thermal ellipsoids are drawn at 40% probability level.  
Both tautomeric hydrogens linked to N1 and N3 atoms, are displayed.

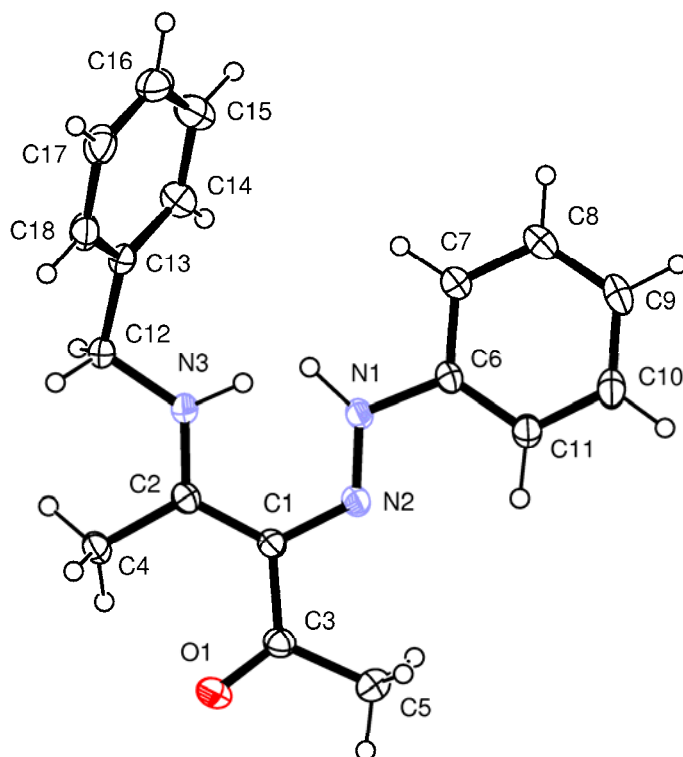

ORTEP view of compound **3f**. Thermal ellipsoids are drawn at 40% probability level.  
Both tautomeric hydrogens linked to N1 and N3 atoms, are displayed.

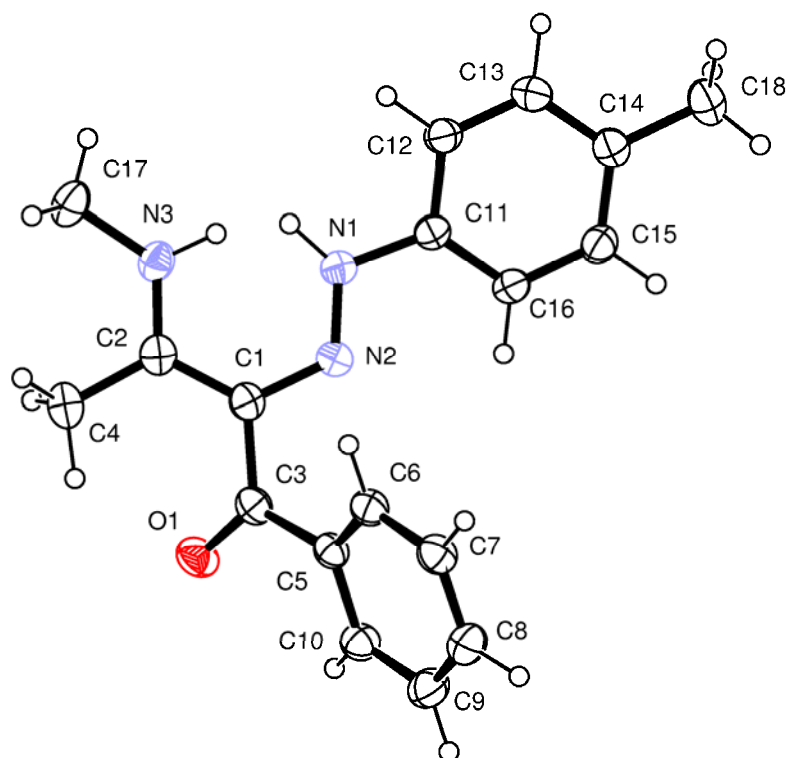

ORTEP view of compound **4a**. Thermal ellipsoids are drawn at 40% probability level.  
Both tautomeric hydrogens linked to N1 and N3 atoms, are displayed.

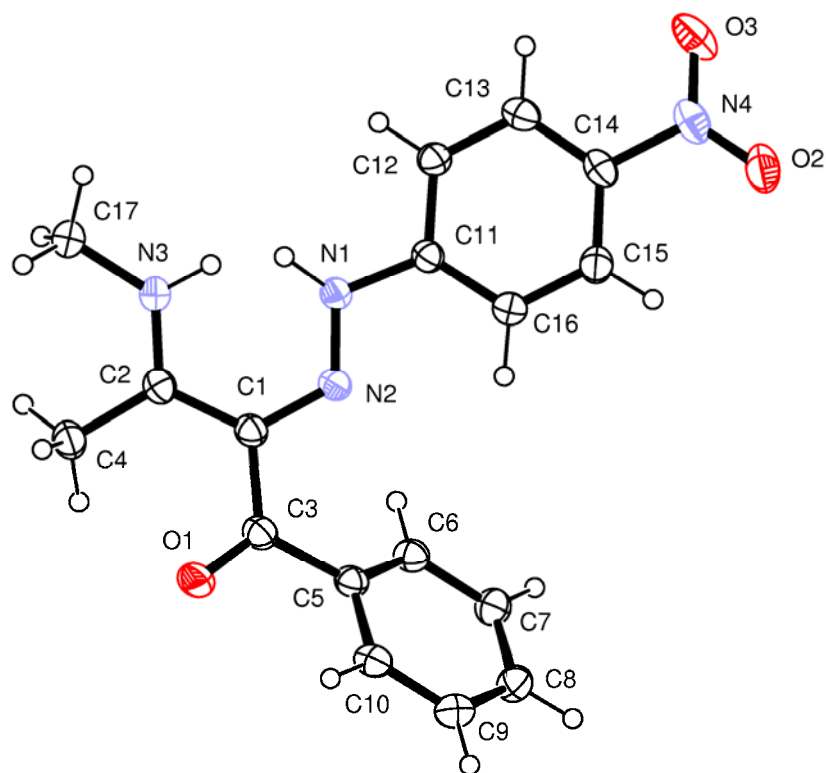

ORTEP view of compound **4b**. Thermal ellipsoids are drawn at 40% probability level.  
Both tautomeric hydrogens linked to N1 and N3 atoms, are displayed.

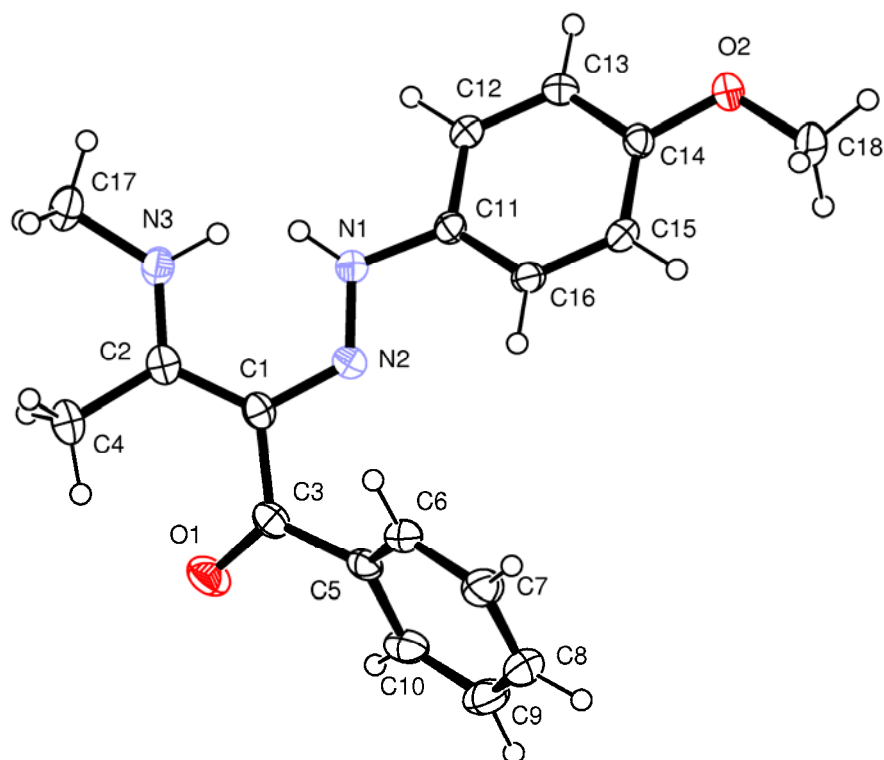

ORTEP view of compound **4c**. Thermal ellipsoids are drawn at 40% probability level.  
Both tautomeric hydrogens linked to N1 and N3 atoms, are displayed.

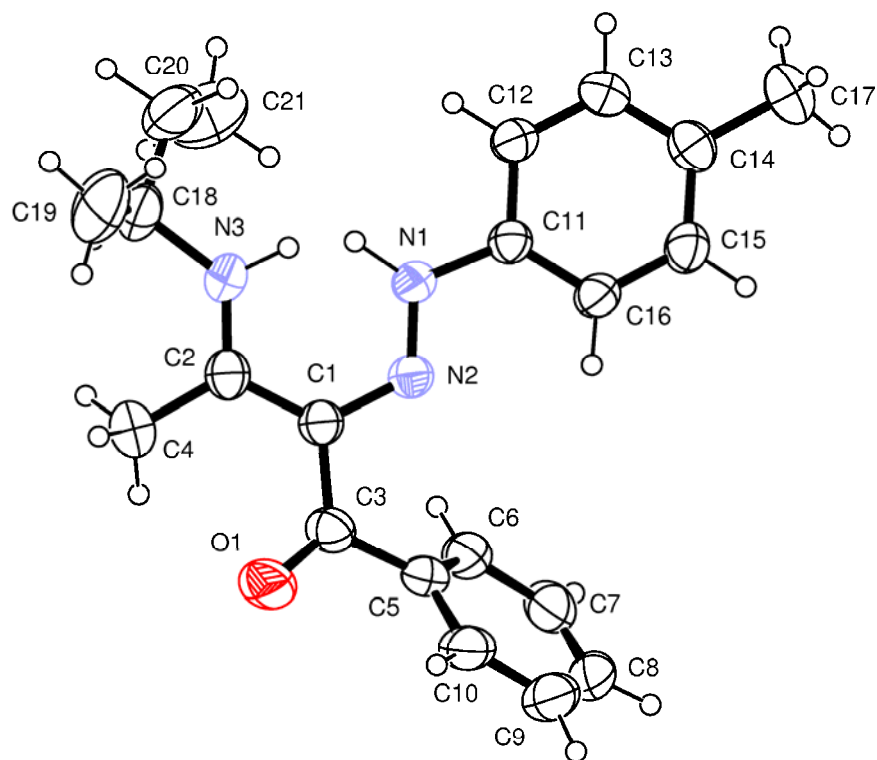

ORTEP view of compound **4e**. Thermal ellipsoids are drawn at 40% probability level.  
Both tautomeric hydrogens linked to N1 and N3 atoms, are displayed.

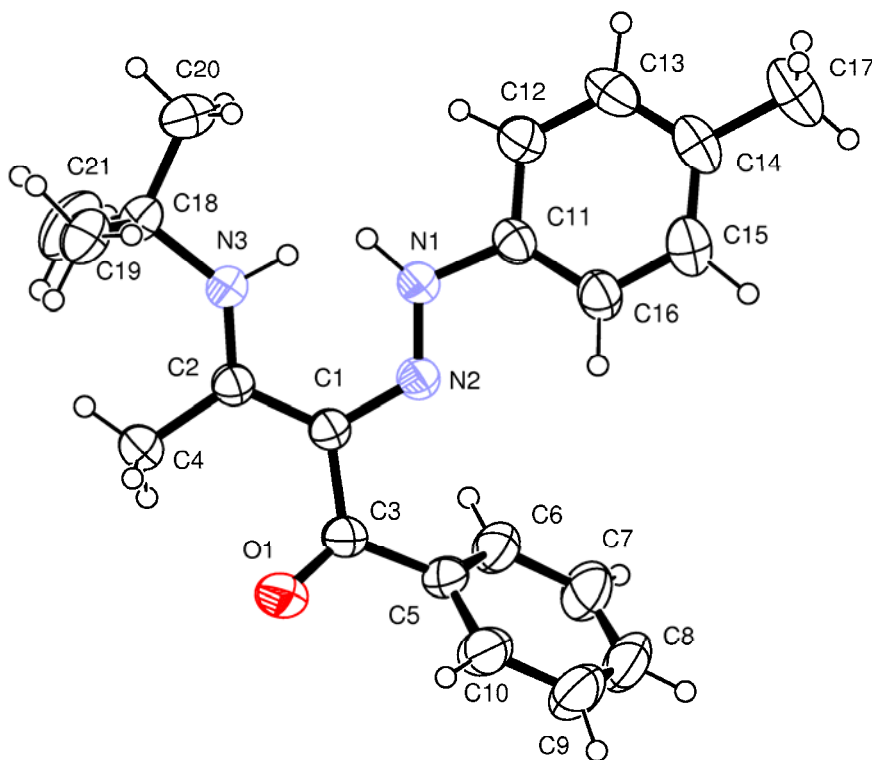

ORTEP view of compound **4f**. Thermal ellipsoids are drawn at 40% probability level.  
Both tautomeric hydrogens linked to N1 and N3 atoms, are displayed.
